**Table S1. *Cis* and *trans* configurations of coding variants in 14 different populations**

| Ancestry group <sup>1</sup> | Population <sup>1</sup> | No. phased genomes | <i>Cis</i> configs dam mut <sup>2</sup> (%) <sup>4</sup> | <i>Trans</i> configs dam mut <sup>2</sup> (%) <sup>5</sup> | <i>Cis</i> configs AA exch <sup>3</sup> (%) <sup>4</sup> | <i>Trans</i> configs AA exch <sup>3</sup> (%) <sup>5</sup> | <i>Cis</i> configs sSNPs (%) <sup>4</sup> | <i>Trans</i> configs sSNPs (%) <sup>5</sup> |
|-----------------------------|-------------------------|--------------------|----------------------------------------------------------|------------------------------------------------------------|----------------------------------------------------------|------------------------------------------------------------|-------------------------------------------|---------------------------------------------|
| EUR                         | GBR                     | 89                 | 61.3                                                     | 38.7                                                       | 60.6                                                     | 39.4                                                       | 63.0                                      | 37.0                                        |
|                             | FIN                     | 93                 | 61.4                                                     | 38.6                                                       | 60.8                                                     | 39.2                                                       | 62.9                                      | 37.1                                        |
|                             | IBS                     | 14                 | 61.6                                                     | 38.4                                                       | 60.9                                                     | 39.1                                                       | 63.1                                      | 36.9                                        |
|                             | CEU                     | 85                 | 61.6                                                     | 38.4                                                       | 61.0                                                     | 39.0                                                       | 62.9                                      | 37.1                                        |
|                             | TSI                     | 98                 | 60.8                                                     | 39.2                                                       | 60.4                                                     | 39.6                                                       | 62.7                                      | 37.3                                        |
| EAS                         | CHS                     | 100                | 59.6                                                     | 40.4                                                       | 60.2                                                     | 39.8                                                       | 62.8                                      | 37.2                                        |
|                             | CHB                     | 97                 | 59.5                                                     | 40.5                                                       | 60.5                                                     | 39.5                                                       | 62.7                                      | 37.3                                        |
|                             | JPT                     | 89                 | 59.6                                                     | 40.4                                                       | 59.8                                                     | 40.2                                                       | 63.0                                      | 37.0                                        |
| AMR                         | PUR                     | 55                 | 60.1                                                     | 39.9                                                       | 59.7                                                     | 40.3                                                       | 62.3                                      | 37.7                                        |
|                             | CLM                     | 60                 | 60.1                                                     | 39.9                                                       | 59.4                                                     | 40.6                                                       | 62.0                                      | 38.0                                        |
|                             | MXL                     | 66                 | 60.0                                                     | 40.0                                                       | 59.6                                                     | 40.4                                                       | 62.7                                      | 37.3                                        |
| AFR                         | YRI                     | 88                 | 54.4                                                     | 45.6                                                       | 53.2                                                     | 46.8                                                       | 54.7                                      | 45.3                                        |
|                             | LWK                     | 97                 | 54.0                                                     | 46.0                                                       | 53.0                                                     | 47.0                                                       | 54.6                                      | 45.4                                        |
|                             | ASW                     | 61                 | 56.3                                                     | 43.7                                                       | 55.6                                                     | 44.4                                                       | 56.8                                      | 43.2                                        |

<sup>1</sup> Description of ancestry groups and population samples in Abecasis et al. (2012), statistically haplotype-resolved genomes from the 1000 Genomes (1000G) Project.

<sup>2</sup> 'Potentially damaging', or 'damaging', mutations from 1000G annotation database; also described as 'protein-altering' in text.

<sup>3</sup> Amino acid (AA) exchanges from 1000G database.

<sup>4</sup> Values represent the median of *cis* fractions per genome (%); these were assessed as the number of *cis* configurations observed across all autosomal protein-coding genes (RefSeq hg19 from UCSC table browser), divided by total configuration count.

<sup>5</sup> Analogous to <sup>4</sup>.

Dam mut, damaging mutations; AA exch, amino acid exchanges; sSNPs, synonymous SNPs.

**Table S2A. *Cis* and *trans* configurations in relation to number of protein-altering mutations**

| No. mutations <sup>1</sup> per gene | Sample <sup>2</sup> No. genomes <sup>3</sup> | Total configs <sup>4</sup> |      | <i>Cis</i> configs <sup>5</sup> |      | <i>Trans</i> configs <sup>5</sup> |      | <i>Cis/Trans</i> ratio      |                               |     |
|-------------------------------------|----------------------------------------------|----------------------------|------|---------------------------------|------|-----------------------------------|------|-----------------------------|-------------------------------|-----|
|                                     |                                              | No.                        | %    | No.                             | %    | No.                               | %    | <i>Cis</i> (%) <sup>6</sup> | <i>Trans</i> (%) <sup>6</sup> |     |
| 2                                   | <b>1000G</b><br>1,092                        | 375,456                    | 66.7 | 247,220                         | 74.6 | 128,236                           | 55.4 | 65.8                        | 34.2                          |     |
| 3                                   |                                              | 104,687                    | 18.6 | 52,316                          | 15.8 | 52,371                            | 22.6 | 50.0                        | 50.0                          |     |
| 4                                   |                                              | 40,826                     | 7.3  | 19,033                          | 5.7  | 21,793                            | 9.4  | 46.6                        | 53.4                          |     |
| 5                                   |                                              | 17,433                     | 3.1  | 6,919                           | 2.1  | 10,514                            | 4.5  | 39.7                        | 60.3                          |     |
| ...                                 |                                              | ...                        | ...  | ...                             | ...  | ...                               | ...  | ...                         | ...                           | ... |
| Total                               |                                              | 562,698                    | 100  | 331,250                         | 100  | 231,448                           | 100  | 58.9                        | 41.1                          |     |
| 2                                   | <b>EUR</b><br>379                            | 123,119                    | 67.1 | 83,432                          | 74.3 | 39,687                            | 55.8 | 67.8                        | 32.2                          |     |
| 3                                   |                                              | 33,595                     | 18.3 | 17,622                          | 15.7 | 15,973                            | 22.4 | 52.5                        | 47.5                          |     |
| 4                                   |                                              | 13,366                     | 7.3  | 6,818                           | 6.1  | 6,548                             | 9.2  | 51.0                        | 49.0                          |     |
| 5                                   |                                              | 5,612                      | 3.1  | 2,384                           | 2.1  | 3,228                             | 4.5  | 42.5                        | 57.5                          |     |
| ...                                 |                                              | ...                        | ...  | ...                             | ...  | ...                               | ...  | ...                         | ...                           | ... |
| Total                               |                                              | 183,536                    | 100  | 112,362                         | 100  | 71,174                            | 100  | 61.2                        | 38.8                          |     |
| 2                                   | <b>EAS</b><br>286                            | 86,830                     | 67.7 | 57,947                          | 75.8 | 28,883                            | 55.8 | 66.7                        | 33.3                          |     |
| 3                                   |                                              | 22,432                     | 17.5 | 11,163                          | 14.6 | 11,269                            | 21.8 | 49.8                        | 50.2                          |     |
| 4                                   |                                              | 9,005                      | 7.0  | 4,201                           | 5.5  | 4,804                             | 9.3  | 46.7                        | 53.3                          |     |
| 5                                   |                                              | 4,092                      | 3.2  | 1,865                           | 2.4  | 2,227                             | 4.3  | 45.6                        | 54.4                          |     |
| ...                                 |                                              | ...                        | ...  | ...                             | ...  | ...                               | ...  | ...                         | ...                           | ... |
| Total                               |                                              | 128,212                    | 100  | 76,436                          | 100  | 51,776                            | 100  | 59.6                        | 40.4                          |     |
| 2                                   | <b>AMR</b><br>181                            | 61,418                     | 66.8 | 40,873                          | 74.0 | 20,545                            | 56.0 | 66.5                        | 33.5                          |     |
| 3                                   |                                              | 16,977                     | 18.5 | 8,810                           | 16.0 | 8,167                             | 22.2 | 51.9                        | 48.1                          |     |
| 4                                   |                                              | 6,680                      | 7.3  | 3,407                           | 6.2  | 3,273                             | 8.9  | 51.0                        | 49.0                          |     |
| 5                                   |                                              | 2,824                      | 3.1  | 1,108                           | 2.0  | 1,716                             | 4.7  | 39.2                        | 60.8                          |     |
| ...                                 |                                              | ...                        | ...  | ...                             | ...  | ...                               | ...  | ...                         | ...                           | ... |
| Total                               |                                              | 91,925                     | 100  | 55,213                          | 100  | 36,712                            | 100  | 60.1                        | 39.9                          |     |
| 2                                   | <b>AFR</b><br>246                            | 104,089                    | 65.5 | 64,968                          | 74.5 | 39,121                            | 54.5 | 62.4                        | 37.6                          |     |
| 3                                   |                                              | 31,683                     | 19.9 | 14,721                          | 16.9 | 16,962                            | 23.6 | 46.5                        | 53.5                          |     |
| 4                                   |                                              | 11,775                     | 7.4  | 4,607                           | 5.3  | 7,168                             | 10.0 | 39.1                        | 60.9                          |     |
| 5                                   |                                              | 4,905                      | 3.1  | 1,562                           | 1.8  | 3,343                             | 4.7  | 31.8                        | 68.2                          |     |
| ...                                 |                                              | ...                        | ...  | ...                             | ...  | ...                               | ...  | ...                         | ...                           | ... |
| Total                               |                                              | 159,025                    | 100  | 87,239                          | 100  | 71,786                            | 100  | 54.9                        | 45.1                          |     |
| 2                                   | <b>PGP</b><br>184                            | 45,313                     | 64.8 | 30,264                          | 71.6 | 15,049                            | 54.4 | 66.8                        | 33.2                          |     |
| 3                                   |                                              | 13,886                     | 19.9 | 7,520                           | 17.8 | 6,366                             | 23.0 | 54.2                        | 45.8                          |     |
| 4                                   |                                              | 4,716                      | 6.7  | 2,018                           | 4.8  | 2,698                             | 9.8  | 42.8                        | 57.2                          |     |
| 5                                   |                                              | 2,347                      | 3.4  | 986                             | 2.3  | 1,361                             | 4.9  | 42.0                        | 58.0                          |     |
| ...                                 |                                              | ...                        | ...  | ...                             | ...  | ...                               | ...  | ...                         | ...                           | ... |
| Total                               |                                              | 69,936                     | 100  | 42,265                          | 100  | 27,671                            | 100  | 60.4                        | 39.6                          |     |

<sup>1</sup> Protein-altering, equivalent to (potentially) damaging mutations from 1000 Genomes (1000G) annotation database (Abecasis et al. 2012), or annotated by PolyPhen-2 (Adzhubei et al. 2010) and SIFT (Ng and Henikoff 2001) as well as GERP conservation scores (Cooper et al. 2005) in the PGP genomes. The number '2' of protein-altering mutations per gene for instance means that all genes that have precisely 2 mutations in a gene have been pooled and analysed.

<sup>2</sup> Description of 1000G samples and the four different ancestry groups (EUR, EAS, AMR, AFR) in Abecasis et al. (2012); description of PGP samples in Mao et al. (2016).

<sup>3</sup> 1,092 genomes (1000G) statistically haplotype-resolved; 184 genomes (PGP) experimentally haplotype-resolved.

<sup>4</sup> The total number of configurations (equivalent to the number of genes with  $\geq 2$  mutations) assessed across specified numbers of genomes from all genes which have given number of protein-altering mutations; expressed in addition as fractions (%) relative to the total number of configurations counted for all genes across all genomes.

<sup>5</sup> The number of *cis* and *trans* configurations, respectively, among the total number of configurations scored in specified samples for genes with given number of mutations; the respective fractions (%) of *cis* and *trans* configurations relative to their total numbers assessed across all genes and genomes are given in addition. The numbers of *cis* and *trans* configurations for any given number of mutations add up to the corresponding totals in <sup>4</sup>.

<sup>6</sup> *Cis* fraction (%) calculated for genes with given number of mutations, dividing the number of *cis* configurations in <sup>5</sup> by the total number of configurations in <sup>4</sup>; *trans* fractions (%) are calculated accordingly. Configs, configurations.

**Table S2B. *Cis* and *trans* configurations in relation to number of AA exchanges and sSNPs**

| Type of variant <sup>1</sup>    | No. variants per gene <sup>2</sup> | Total configs <sup>3</sup> |      | No. <i>cis</i> configs <sup>4</sup> | No. <i>trans</i> configs <sup>4</sup> | <i>Cis/Trans</i> ratio      |                               |
|---------------------------------|------------------------------------|----------------------------|------|-------------------------------------|---------------------------------------|-----------------------------|-------------------------------|
|                                 |                                    | No.                        | %    |                                     |                                       | <i>Cis</i> (%) <sup>5</sup> | <i>Trans</i> (%) <sup>5</sup> |
| AA exchanges                    | 2                                  | 869,855                    | 57.7 | 590,886                             | 278,969                               | 67.9                        | 32.1                          |
|                                 | 3                                  | 323,655                    | 21.5 | 171,127                             | 152,528                               | 52.9                        | 47.1                          |
|                                 | 4                                  | 140,027                    | 9.3  | 63,395                              | 76,632                                | 45.3                        | 54.7                          |
|                                 | 5                                  | 67,527                     | 4.5  | 27,505                              | 40,022                                | 40.7                        | 59.3                          |
|                                 | ...                                | ...                        | ...  | ...                                 | ...                                   | ...                         | ...                           |
|                                 | Total                              | 1,506,764                  | 100  | 880,549                             | 626,215                               | 58.4                        | 41.6                          |
| sSNPs                           | 2                                  | 1,037,140                  | 59.6 | 725,071                             | 312,069                               | 69.9                        | 30.1                          |
|                                 | 3                                  | 381,027                    | 21.9 | 204,269                             | 176,758                               | 53.6                        | 46.4                          |
|                                 | 4                                  | 156,911                    | 9.0  | 70,346                              | 86,565                                | 44.8                        | 55.2                          |
|                                 | 5                                  | 72,263                     | 4.2  | 28,506                              | 43,757                                | 39.4                        | 60.6                          |
|                                 | ...                                | ...                        | ...  | ...                                 | ...                                   | ...                         | ...                           |
|                                 | Total                              | 1,740,093                  | 100  | 1,053,883                           | 686,210                               | 60.6                        | 39.4                          |
| AA exchanges and sSNPs combined | 2                                  | 1,610,775                  | 47.3 | 1,106,736                           | 504,039                               | 68.7                        | 31.3                          |
|                                 | 3                                  | 777,497                    | 22.8 | 416,154                             | 361,343                               | 53.5                        | 46.5                          |
|                                 | 4                                  | 406,970                    | 12.0 | 181,054                             | 225,916                               | 44.5                        | 55.5                          |
|                                 | 5                                  | 224,911                    | 6.6  | 87,761                              | 137,150                               | 39.0                        | 61.0                          |
|                                 | ...                                | ...                        | ...  | ...                                 | ...                                   | ...                         | ...                           |
|                                 | Total                              | 3,403,910                  | 100  | 1,900,122                           | 1,503,788                             | 55.8/58.2 <sup>6</sup>      | 44.2/41.8 <sup>6</sup>        |

<sup>1</sup> Amino acid (AA) exchanges from 1000 Genomes (1000G) Project database (Abecasis et al. 2012); synonymous SNPs (sSNPs).

<sup>2</sup> The number '2' for instance of any type/combination of coding variants per gene specified means that all genes that have precisely 2 variants in a gene have been pooled and analysed in the 1,092 genomes (1000G).

<sup>3</sup> The total number of configurations (equivalent to the number of genes with  $\geq 2$  coding variants) assessed across 1,092 genomes from all genes which have specified number of coding variants, expressed in addition as fractions (%) relative to the total number of configurations counted for all genes across all genomes.

<sup>4</sup> The number of *cis* and *trans* configurations, respectively, among the total number of configurations scored in the 1,092 genomes for genes with specified number of mutations.

<sup>5</sup> *Cis* fraction (%) calculated for genes with given number of coding variants, dividing the number of *cis* configurations in <sup>4</sup> by the total number of configurations in <sup>3</sup>; *trans* fractions (%) are calculated accordingly.

<sup>6</sup> The median values, which are used in main text to be consistent with the other *cis/trans* ratios, are presented in addition. All other values are average values.

Configs, configurations.

**Table S3. Simulation of expected *cis/trans* ratios in relation to number of mutations**

| Type of variant        | No. variants per gene <sup>2</sup> | Total configs <sup>1</sup> |      | No. <i>cis</i> configs <sup>2</sup> | No. <i>trans</i> configs <sup>2</sup> | <i>Cis/Trans</i> ratio |           |
|------------------------|------------------------------------|----------------------------|------|-------------------------------------|---------------------------------------|------------------------|-----------|
|                        |                                    | No.                        | %    |                                     |                                       | Cis (%)                | Trans (%) |
| Protein-altering       | 2                                  | 436,960                    | 66.4 | 217,789                             | 219,171                               | 49.8                   | 50.2      |
|                        | 3                                  | 132,308                    | 20.1 | 33,327                              | 98,981                                | 25.2                   | 74.8      |
|                        | 4                                  | 45,285                     | 6.9  | 5,669                               | 39,616                                | 12.5                   | 87.5      |
|                        | 5                                  | 17,931                     | 2.7  | 1,112                               | 16,819                                | 6.2                    | 93.8      |
|                        | ...                                | ...                        | ...  | ...                                 | ...                                   | ...                    | ...       |
|                        | Total                              | 657,875                    | 100  | 258,267                             | 399,608                               | 39.3                   | 60.7      |
| AA exchanges           | 2                                  | 951,313                    | 59.0 | 475,137                             | 476,176                               | 49.9                   | 50.1      |
|                        | 3                                  | 355,549                    | 22.0 | 89,295                              | 266,254                               | 25.1                   | 74.9      |
|                        | 4                                  | 144,799                    | 9.0  | 18,029                              | 126,770                               | 12.5                   | 87.5      |
|                        | 5                                  | 65,041                     | 4.0  | 4,056                               | 60,985                                | 6.2                    | 93.8      |
|                        | ...                                | ...                        | ...  | ...                                 | ...                                   | ...                    | ...       |
|                        | Total                              | 1,612,714                  | 100  | 588,494                             | 1,024,220                             | 36.5                   | 63.5      |
| sSNPs                  | 2                                  | 1,098,368                  | 60.3 | 548,709                             | 549,659                               | 50.0                   | 50.0      |
|                        | 3                                  | 407,820                    | 22.4 | 101,771                             | 306,049                               | 25.0                   | 75.0      |
|                        | 4                                  | 162,939                    | 8.9  | 20,387                              | 142,552                               | 12.5                   | 87.5      |
|                        | 5                                  | 70,648                     | 3.9  | 4,448                               | 66,200                                | 6.3                    | 93.7      |
|                        | ...                                | ...                        | ...  | ...                                 | ...                                   | ...                    | ...       |
|                        | Total                              | 1,821,931                  | 100  | 676,751                             | 1,145,181                             | 37.1                   | 62.9      |
| AA exchanges and sSNPs | 2                                  | 1,803,140                  | 50.1 | 900,986                             | 902,154                               | 50.0                   | 50.0      |
|                        | 3                                  | 848,382                    | 23.6 | 212,572                             | 635,810                               | 25.1                   | 74.9      |
|                        | 4                                  | 415,336                    | 11.5 | 51,629                              | 363,707                               | 12.4                   | 87.6      |
|                        | 5                                  | 211,775                    | 5.9  | 13,293                              | 198,482                               | 6.3                    | 93.7      |
|                        | ...                                | ...                        | ...  | ...                                 | ...                                   | ...                    | ...       |
|                        | Total                              | 3,599,219                  | 100  | 1,183,593                           | 2,415,626                             | 32.9                   | 67.1      |

Simulations of phased genomes were performed as described in Methods. To simulate *cis/trans* ratios which can be expected under conditions of random distribution of variants between the two homologues, in principle, each variant had a 50:50 chance to reside on either one of these.

<sup>1</sup> The total number of configurations assessed across 1,092 simulated genomes from all genes which have indicated number of protein-altering mutations, amino acid (AA) exchanges, or synonymous SNPs (sSNPs); expressed in addition as fractions (%) relative to the total number of configurations counted across all genes.

<sup>2</sup> The number of *cis* and *trans* configurations, respectively, among the total number of configurations obtained from the 1,092 simulated genomes from genes with given number of mutations; the respective fractions (%) of *cis* and *trans* configurations relative to their total numbers assessed across all genes with defined number of variants are given in addition. The numbers of *cis* and *trans* configurations for a given number of mutations add up to the corresponding totals in <sup>1</sup>.

**Table S4. Inter-mutation genome distances in *cis*- versus *trans* configurations**

| Population Samples <sup>1</sup> | No. phased genomes | <i>Cis</i> distance dam mut <sup>2</sup> (bp) | <i>Trans</i> distance dam mut <sup>2</sup> (bp) | <i>Cis</i> distance AA exch <sup>3</sup> (bp) | <i>Trans</i> distance AA exch <sup>3</sup> (bp) | <i>Cis</i> distance sSNPs <sup>4</sup> (bp) | <i>Trans</i> distance sSNPs <sup>4</sup> (bp) |
|---------------------------------|--------------------|-----------------------------------------------|-------------------------------------------------|-----------------------------------------------|-------------------------------------------------|---------------------------------------------|-----------------------------------------------|
| Total                           | 1,092              | 1,607                                         | 5,125                                           | 2,130                                         | 6,275                                           | 3,665                                       | 7,761                                         |
| EUR                             | 379                | 1,570                                         | 5,290                                           | 2,248                                         | 6,532                                           | 3,638                                       | 7,982                                         |
| AFR                             | 246                | 1,830                                         | 4,771                                           | 2,189                                         | 5,546                                           | 3,888                                       | 7,228                                         |
| PGP                             | 184                | 2,584                                         | 5,984                                           | 2,058                                         | 5,920                                           | 3,562                                       | 8,280                                         |

<sup>1</sup> Description of 1000 Genomes (1000G) samples and ancestry groups EUR and AFR in Abecasis et al. (2012); description of PGP samples in Mao et al. (2016).

<sup>2</sup> Distance in bp between pairs of (potentially) damaging mutations, equivalent to 'protein-altering' mutations, that reside in *cis* configurations compared to pairs in *trans* configurations; annotation from 1000G annotation database, or annotated by PolyPhen-2 (Adzhubei et al. 2010) and SIFT (Ng and Henikoff 2001) as well as GERP conservation scores (Cooper et al. 2005) in the PGP genomes.

<sup>3</sup> Distance in bp between pairs of amino acid (AA) exchanges that reside in *cis* configurations compared to those in *trans* configurations.

<sup>4</sup> Distance in bp between pairs of synonymous SNPs (sSNPs) that reside in *cis* configurations compared to those in *trans* configurations.

**Table S5. Number of phase-sensitive genes and their *cis* and *trans* configurations****(A) Genes with configurations of protein-altering mutations<sup>1</sup>**

| Samples | No. phased genomes | No. phase-sensitive genes <sup>2</sup> per genome <sup>3,4</sup> | Min – Max | No. genes with <i>cis</i> configs <sup>3</sup> per genome <sup>3</sup> | Min – Max | No. genes with <i>trans</i> configs <sup>3</sup> per genome <sup>3</sup> | Min – Max |
|---------|--------------------|------------------------------------------------------------------|-----------|------------------------------------------------------------------------|-----------|--------------------------------------------------------------------------|-----------|
| Total   | 1,092              | 487                                                              | 393 - 710 | 297                                                                    | 221 - 397 | 193                                                                      | 132 - 342 |
| EUR     | 379                | 484                                                              | 428 - 554 | 296                                                                    | 258 - 353 | 187                                                                      | 145 - 228 |
| EAS     | 286                | 449                                                              | 393 - 505 | 269                                                                    | 221 - 307 | 180                                                                      | 147 - 223 |
| AMR     | 181                | 510                                                              | 393 - 613 | 306                                                                    | 224 - 374 | 201                                                                      | 132 - 287 |
| AFR     | 246                | 647                                                              | 436 - 710 | 354                                                                    | 275 - 397 | 292                                                                      | 161 - 342 |

<sup>1</sup> Protein-altering mutations: equivalent to (potentially) damaging mutations from the 1000 Genomes annotation database (Abecasis et al. 2012).

<sup>2</sup> Defined by presence of  $\geq 2$  protein-altering mutations.

<sup>3</sup> Data represent median values.

<sup>4</sup> Numbers are not equivalent to the sum of genes with *cis* and *trans* configurations, because median values are used. Configs, configurations.

**(B) Genes with configurations of amino acid (AA) exchanges<sup>1</sup>**

| Samples | No. phased genomes | No. phase-sensitive genes <sup>2</sup> per genome <sup>3,4</sup> | Min – Max     | No. genes with <i>cis</i> configs <sup>3</sup> per genome <sup>3</sup> | Min – Max   | No. genes with <i>trans</i> configs <sup>3</sup> per genome <sup>3</sup> | Min – Max |
|---------|--------------------|------------------------------------------------------------------|---------------|------------------------------------------------------------------------|-------------|--------------------------------------------------------------------------|-----------|
| Total   | 1,092              | 1,317                                                            | 1,025 - 1,858 | 796                                                                    | 607 - 1,021 | 521                                                                      | 402 - 885 |
| EUR     | 379                | 1,309                                                            | 1,195 - 1,437 | 795                                                                    | 734 - 886   | 514                                                                      | 452 - 594 |
| EAS     | 286                | 1,201                                                            | 1,044 - 1,298 | 722                                                                    | 610 - 789   | 476                                                                      | 419 - 560 |
| AMR     | 181                | 1,363                                                            | 1,025 - 1,664 | 817                                                                    | 607 - 963   | 551                                                                      | 402 - 756 |
| AFR     | 246                | 1,711                                                            | 1,210 - 1,858 | 918                                                                    | 765 - 1,021 | 793                                                                      | 445 - 885 |

<sup>1</sup> AA exchanges from the 1000 Genomes annotation database (Abecasis et al. 2012).

<sup>2</sup> Defined by presence of  $\geq 2$  AA exchanges.

<sup>3</sup> Data represent median values.

<sup>4</sup> Numbers are not necessarily equivalent to the sum of genes with *cis* and *trans* configurations, because median values are used. Configs, configurations.

**Table S6. From mutations to genes to phase configurations****(A) From protein-altering mutations to genes to phase configurations**

| Population samples | No. phased genomes | (a) No. mutations <sup>1</sup> per genome <sup>2</sup> | (b) No. genes with $\geq 1$ mutation per genome | Quot (b)/(a) | (c) No. genes with $=1$ mutation per genome | Quot (c)/(a) <sup>3</sup> | (d) No. genes with $\geq 2$ mutations <sup>4,5</sup> per genome | Quot (d)/(a) | (e) No. genes with <i>cis</i> configs per genome | Quot (e)/(a) | (f) No. genes with <i>trans</i> configs per genome | Quot (f)/(a) |
|--------------------|--------------------|--------------------------------------------------------|-------------------------------------------------|--------------|---------------------------------------------|---------------------------|-----------------------------------------------------------------|--------------|--------------------------------------------------|--------------|----------------------------------------------------|--------------|
| Total              | 1,092              | 2,869                                                  | 2,023                                           | 0.71         | 1,541                                       | 0.54                      | 487                                                             | 0.17         | 297                                              | 0.10         | 193                                                | 0.07         |
| EUR                | 379                | 2,847                                                  | 2,015                                           | 0.71         | 1,532                                       | 0.54                      | 484                                                             | 0.17         | 296                                              | 0.10         | 187                                                | 0.07         |
| EAS                | 286                | 2,656                                                  | 1,872                                           | 0.71         | 1,422                                       | 0.54                      | 449                                                             | 0.17         | 269                                              | 0.10         | 180                                                | 0.07         |
| AMR                | 181                | 2,956                                                  | 2,088                                           | 0.71         | 1,576                                       | 0.53                      | 510                                                             | 0.17         | 306                                              | 0.10         | 201                                                | 0.07         |
| AFR                | 246                | 3,672                                                  | 2,557                                           | 0.70         | 1,907                                       | 0.52                      | 647                                                             | 0.18         | 354                                              | 0.10         | 292                                                | 0.08         |

<sup>1</sup> Protein-altering, used synonymously for (potentially) damaging, mutations from 1000 Genomes annotation database (Abecasis et al. 2012).

<sup>2</sup> Mutations within exonic sequences of the autosomal protein-coding genes; calculated from a total of 3,280,032 mutations in 1,092 genomes, 1,082,993 in EUR, 759,570 in EAS, 534,596 in AMR, and 902,873 in AFR.

<sup>3</sup> Equivalent to the fraction of mutations that are contained in this gene category, see Supplemental Table S2B.

<sup>4</sup> Numbers are not equivalent to the sum of genes with *cis* and *trans* configurations, because median values are used. Essentially all data represent median values.

<sup>5</sup> Genes with  $\geq 2$  mutations also defined as 'phase-sensitive' genes.

Quot, quotient; configs, configurations.

**(B) Distribution of protein-altering mutations among gene categories**

| Population samples | No. phased genomes | No. mutations <sup>1</sup> per genome <sup>2</sup> | Mutations in genes with 1 mutation (%) <sup>3</sup> | Mutations in genes with $\geq 2$ mutations (%) <sup>4</sup> | No. mutations per gene with $\geq 2$ mutations <sup>5</sup> | Mutations in genes with <i>cis</i> configs (%) <sup>6,8</sup> | Mutations in genes with <i>trans</i> configs (%) <sup>7,8</sup> |
|--------------------|--------------------|----------------------------------------------------|-----------------------------------------------------|-------------------------------------------------------------|-------------------------------------------------------------|---------------------------------------------------------------|-----------------------------------------------------------------|
| Total              | 1,092              | 2,869                                              | 53.24                                               | 46.76                                                       | 2.73                                                        | 24.81                                                         | 21.95                                                           |
| EUR                | 379                | 2,847                                              | 53.96                                               | 46.04                                                       | 2.72                                                        | 25.66                                                         | 20.38                                                           |
| EAS                | 286                | 2,656                                              | 53.8                                                | 46.2                                                        | 2.75                                                        | 24.66                                                         | 21.54                                                           |
| AMR                | 181                | 2,956                                              | 53.07                                               | 46.93                                                       | 2.71                                                        | 25.55                                                         | 21.38                                                           |
| AFR                | 246                | 3,672                                              | 52.02                                               | 47.98                                                       | 2.73                                                        | 23.47                                                         | 24.51                                                           |

<sup>1</sup> Protein-altering, used synonymously for (potentially) damaging, mutations from 1000 Genomes annotation database (Abecasis et al. 2012).

<sup>2</sup> Mutations within exonic sequences of the autosomal protein-coding genes.

<sup>3</sup> Number of genes with one mutation (equivalent to the number of mutations contained in this gene category) divided by total number of mutations per genome.

<sup>4</sup> Number of mutations contained in genes with  $\geq 2$  mutations divided by total number of mutations per genome.

<sup>5</sup> Number of mutations contained in genes with  $\geq 2$  mutations divided by number of genes with  $\geq 2$  mutations per genome (see Supplemental Table S6A).

<sup>6</sup> Number of mutations contained in *cis* configurations divided by number of mutations per genome (see Supplemental Table S6A).

<sup>7</sup> Number of mutations contained in *trans* configurations divided by number of mutations per genome (see Supplemental Table S6A).

<sup>8</sup> Numbers are not necessarily equivalent to the sum of mutations contained in genes with  $\geq 2$  mutations, because median values are used.

### (C) From amino acid (AA) exchanges to genes to phase configurations

| Population samples | No. phased genomes | (a) No. mutations <sup>1</sup> per genome <sup>2</sup> | (b) No. genes with $\geq 1$ mutation per genome | Quot (b)/(a) <sup>3</sup> | (c) No. genes with =1 mutation per genome | Quot (c)/(a) <sup>3</sup> | (d) No. genes with $\geq 2$ mutations per genome <sup>4, 5</sup> | Quot (d)/(a) | (e) No. genes with <i>cis</i> configs per genome | Quot (e)/(a) | (f) No. genes with <i>trans</i> configs per genome | Quot (f)/(a) |
|--------------------|--------------------|--------------------------------------------------------|-------------------------------------------------|---------------------------|-------------------------------------------|---------------------------|------------------------------------------------------------------|--------------|--------------------------------------------------|--------------|----------------------------------------------------|--------------|
| Total              | 1,092              | 6,456                                                  | 3,771                                           | 0.58                      | 2,456                                     | 0.38                      | 1,317                                                            | 0.20         | 796                                              | 0.12         | 521                                                | 0.08         |
| EUR                | 379                | 6,429                                                  | 3,759                                           | 0.59                      | 2,447                                     | 0.38                      | 1,309                                                            | 0.20         | 795                                              | 0.12         | 514                                                | 0.08         |
| EAS                | 286                | 5,972                                                  | 3,483                                           | 0.58                      | 2,283                                     | 0.38                      | 1,201                                                            | 0.20         | 722                                              | 0.12         | 476                                                | 0.08         |
| AMR                | 181                | 6,676                                                  | 3,876                                           | 0.58                      | 2,511                                     | 0.38                      | 1,363                                                            | 0.20         | 817                                              | 0.12         | 551                                                | 0.08         |
| AFR                | 246                | 8,229                                                  | 4,689                                           | 0.57                      | 2,974                                     | 0.36                      | 1,711                                                            | 0.21         | 918                                              | 0.11         | 793                                                | 0.10         |

<sup>1</sup> Amino acid (AA) exchanges from 1000 Genomes annotation database (Abecasis et al. 2012).

<sup>2</sup> AA exchanges within exonic sequences of the autosomal protein-coding genes.

<sup>3</sup> Equivalent to the fraction of AA exchanges that are contained in this gene category, see Supplemental Table S6D.

<sup>4</sup> Numbers are not equivalent to the sum of genes with *cis* and *trans* configurations, because median values are used. Essentially all data represent median values.

<sup>5</sup> Genes with  $\geq 2$  AA exchanges, also defined as 'phase-sensitive' genes.

Quot, quotient; configs, configurations.

### (D) Distribution of AA exchanges among gene categories

| Population samples | No. phased genomes | No. mutations <sup>1</sup> per genome <sup>2</sup> | Mutations in genes with 1 mutation (%) <sup>3</sup> | Mutations in genes with $\geq 2$ mutations (%) <sup>4</sup> | No. mutations per gene with $\geq 2$ mutations <sup>5</sup> | Mutations in genes with <i>cis</i> configs (%) <sup>6,8</sup> | Mutations in genes with <i>trans</i> configs (%) <sup>7,8</sup> |
|--------------------|--------------------|----------------------------------------------------|-----------------------------------------------------|-------------------------------------------------------------|-------------------------------------------------------------|---------------------------------------------------------------|-----------------------------------------------------------------|
| <b>Total</b>       | 1,092              | 6,456                                              | 37.57                                               | 62.43                                                       | 3.20                                                        | 31.32                                                         | 31.11                                                           |
| <b>EUR</b>         | 379                | 6,429                                              | 38.13                                               | 61.87                                                       | 3.04                                                        | 32.60                                                         | 29.27                                                           |
| <b>EAS</b>         | 286                | 5,972                                              | 38.34                                               | 61.66                                                       | 3.07                                                        | 31.78                                                         | 29.88                                                           |
| <b>AMR</b>         | 181                | 6,676                                              | 37.58                                               | 62.42                                                       | 3.06                                                        | 32.06                                                         | 30.36                                                           |
| <b>AFR</b>         | 246                | 8,229                                              | 36.25                                               | 63.75                                                       | 3.06                                                        | 28.93                                                         | 34.82                                                           |

<sup>1</sup> AA exchanges from 1000 Genomes annotation database (Abecasis et al. 2012).

<sup>2</sup> Mutations within exonic sequences of autosomal protein-coding genes.

<sup>3</sup> Number of genes with one AA exchange (equivalent to the number of AA exchanges contained in this gene category) divided by total number of AA exchanges per genome.

<sup>4</sup> Number of AA exchanges contained in genes with  $\geq 2$  AA exchanges, divided by total number of AA exchanges per genome.

<sup>5</sup> Number of AA exchanges contained in genes with  $\geq 2$  AA exchanges divided by number of genes with  $\geq 2$  AA exchanges per genome (see Supplemental Table S6A).

<sup>6</sup> Number of AA exchanges contained in *cis* configurations divided by number of AA exchanges per genome (see Supplemental Table S6A).

<sup>7</sup> Number of AA exchanges contained in *trans* configurations divided by number of AA exchanges per genome (see Supplemental Table S6A).

<sup>8</sup> Numbers are not necessarily equivalent to the sum of mutations contained in genes with  $\geq 2$  AA exchanges, because median values are used.



**Table S7. Simulation of proportionality constants (quotients)**

|                       | No. phased genomes | (a) No. mutations per genome <sup>1</sup> | (b) No. genes with $\geq 1$ mutation per genome | Quot (b)/(a) | (c) No. genes with $= 1$ mutation per genome | Quot (c)/(a) | (d) No. genes with $\geq 2$ mutations per genome <sup>4,5</sup> | Quot (d)/(a) | (e) No. genes with <i>cis</i> configs per genome | Quot (e)/(a) | (f) No. genes with <i>trans</i> configs per genome | Quot (f)/(a) |
|-----------------------|--------------------|-------------------------------------------|-------------------------------------------------|--------------|----------------------------------------------|--------------|-----------------------------------------------------------------|--------------|--------------------------------------------------|--------------|----------------------------------------------------|--------------|
| <b>SIMULATED DATA</b> |                    |                                           |                                                 |              |                                              |              |                                                                 |              |                                                  |              |                                                    |              |
| Protein-altering      | 1,092              | 3,102                                     | 2,119                                           | 0.68         | 1,519                                        | 0.49         | 597                                                             | 0.19         | 237                                              | 0.08         | 363                                                | 0.12         |
| AA exchanges          | 1,092              | 6,855                                     | 4,023                                           | 0.59         | 2,543                                        | 0.37         | 1,478                                                           | 0.22         | 540                                              | 0.08         | 936                                                | 0.14         |
| <b>REAL DATA</b>      |                    |                                           |                                                 |              |                                              |              |                                                                 |              |                                                  |              |                                                    |              |
| Protein-altering      | 1,092              | 2,869                                     | 2,023                                           | 0.71         | 1,541                                        | 0.54         | 487.0                                                           | 0.17         | 297.0                                            | 0.10         | 193.0                                              | 0.07         |
| AA exchanges          | 1,092              | 6,456                                     | 3,771                                           | 0.58         | 2,456                                        | 0.38         | 1,317                                                           | 0.2          | 796                                              | 0.12         | 521                                                | 0.08         |

The generation of virtual sets of 1,092 phased genomes, the analyses of which are presented under 'SIMULATED DATA' is described in Methods; the data presented in the section 'REAL DATA' are excerpts from Supplemental Tables S6A, C. See also legends of these tables for further detail. See also Supplemental Note for approximation of proportionality constants.

<sup>1</sup> For each virtual genome, random numbers of protein-altering mutations, equivalent to (potentially) damaging mutations, were drawn in the range observed in the 1,092 genomes dataset (~2,500–3,500) from the 1000 Genomes (1000G) database (Abecasis et al. 2012). These mutations were sampled from the total of ~300,000 protein-altering mutations annotated in this data set. To generate a second virtual set of 1,092 phased genomes from the entirety of amino acid (AA) exchanges, between ~5,500 and ~7,500 nsSNPs were drawn randomly from the entire pool of ~1.5 Mio nsSNPs annotated in the 1,092 'real' genomes. Importantly, phase was simulated assigning to every single mutation drawn a 50:50 chance to exist on either homologue 1 or 2 (see also Methods). With the exception of the quotients, all numbers of mutations per genome in both the simulated and 'real data' represent median values. Quot, quotient; configs, configurations.

**Table S14. *Cis* configurations per autosome in 1,092 genomes and different ancestry-based groups  
(A) *Cis* configurations of protein-altering mutations**

|        | <i>Cis</i> configurations (%) <sup>1</sup> |      |      |      |      |
|--------|--------------------------------------------|------|------|------|------|
|        | 1,092                                      | EUR  | EAS  | AMR  | AFR  |
| chr1   | 63.1                                       | 65.6 | 64.3 | 63.6 | 55.1 |
| chr2   | 58.6                                       | 59.1 | 60.8 | 58.1 | 56.3 |
| chr3   | 60.0                                       | 61.9 | 61.1 | 62.1 | 53.8 |
| chr4   | 62.5                                       | 64.7 | 66.7 | 62.5 | 52.4 |
| chr5   | 60.9                                       | 65.0 | 60.0 | 61.9 | 55.2 |
| chr6   | 53.1                                       | 56.0 | 52.6 | 54.2 | 48.8 |
| chr7   | 60.0                                       | 62.5 | 60.0 | 60.0 | 55.7 |
| chr8   | 52.9                                       | 53.8 | 53.8 | 53.3 | 49.0 |
| chr9   | 55.9                                       | 59.1 | 52.5 | 59.1 | 52.8 |
| chr10  | 52.6                                       | 54.5 | 50.0 | 54.2 | 52.0 |
| chr11  | 60.6                                       | 60.0 | 62.2 | 60.9 | 60.0 |
| chr12  | 54.5                                       | 57.1 | 50.0 | 52.9 | 54.5 |
| chr13  | 62.5                                       | 66.7 | 66.7 | 66.7 | 57.1 |
| chr14  | 68.8                                       | 71.4 | 73.5 | 68.8 | 61.5 |
| chr15  | 56.3                                       | 55.6 | 61.5 | 57.1 | 50.9 |
| chr16  | 61.9                                       | 66.7 | 60.0 | 65.0 | 55.4 |
| chr17  | 57.6                                       | 59.4 | 58.5 | 57.6 | 55.9 |
| chr18  | 55.6                                       | 50.0 | 57.1 | 55.6 | 55.6 |
| chr19  | 60.6                                       | 61.9 | 61.1 | 62.0 | 58.3 |
| chr20  | 64.3                                       | 68.8 | 66.7 | 64.3 | 56.8 |
| chr21  | 60.0                                       | 66.7 | 60.0 | 62.5 | 50.0 |
| chr22  | 66.7                                       | 71.4 | 62.5 | 70.0 | 50.0 |
| Median | 60.0                                       | 61.9 | 60.4 | 61.4 | 55.2 |
| Min    | 52.6                                       | 50.0 | 50.0 | 52.9 | 48.8 |
| Max    | 68.8                                       | 71.4 | 73.5 | 70.0 | 61.5 |

<sup>1</sup> Values represent the median of *cis* fractions (%) per autosome per genome; these were assessed as the number of *cis* configurations observed across all autosomal protein-coding genes contained in designated autosome, divided by total configuration count per autosome.

**(B) Cis configurations of AA exchanges**

|        | <b>Cis configurations (%)<sup>1</sup></b> |      |      |      |      |
|--------|-------------------------------------------|------|------|------|------|
|        | 1,092                                     | EUR  | EAS  | AMR  | AFR  |
| chr1   | 58.5                                      | 60.2 | 59.8 | 58.5 | 52.8 |
| chr2   | 56.9                                      | 57.7 | 58.1 | 57.3 | 53.5 |
| chr3   | 63.1                                      | 65.8 | 64.9 | 64.4 | 54.6 |
| chr4   | 60.0                                      | 61.7 | 60.0 | 60.0 | 56.2 |
| chr5   | 59.3                                      | 61.9 | 60.0 | 59.6 | 52.2 |
| chr6   | 54.5                                      | 56.4 | 54.8 | 55.2 | 50.5 |
| chr7   | 58.3                                      | 60.6 | 59.2 | 58.9 | 52.7 |
| chr8   | 57.9                                      | 58.5 | 63.6 | 57.9 | 50.8 |
| chr9   | 54.8                                      | 56.5 | 54.3 | 56.9 | 51.8 |
| chr10  | 57.1                                      | 59.2 | 57.1 | 58.0 | 53.5 |
| chr11  | 60.3                                      | 60.5 | 62.0 | 60.6 | 57.7 |
| chr12  | 57.1                                      | 59.3 | 57.1 | 57.4 | 53.2 |
| chr13  | 59.1                                      | 62.5 | 58.3 | 60.0 | 53.8 |
| chr14  | 60.2                                      | 61.7 | 61.8 | 61.0 | 55.5 |
| chr15  | 55.8                                      | 57.6 | 57.9 | 56.8 | 47.8 |
| chr16  | 56.4                                      | 58.9 | 54.8 | 58.0 | 52.9 |
| chr17  | 58.9                                      | 59.4 | 62.1 | 58.5 | 54.2 |
| chr18  | 47.8                                      | 47.8 | 47.4 | 47.6 | 50.0 |
| chr19  | 67.3                                      | 68.7 | 69.6 | 67.7 | 57.9 |
| chr20  | 63.3                                      | 66.7 | 63.8 | 63.3 | 57.1 |
| chr21  | 53.3                                      | 56.3 | 55.0 | 56.3 | 47.2 |
| chr22  | 60.0                                      | 64.3 | 60.0 | 64.3 | 49.0 |
| Median | 58.4                                      | 59.8 | 59.5 | 58.5 | 53.1 |
| Min    | 47.8                                      | 47.8 | 47.4 | 47.6 | 47.2 |
| Max    | 67.3                                      | 68.7 | 69.6 | 67.7 | 57.9 |

<sup>1</sup> Values represent the median of *cis* fractions (%) per autosome per genome; these were assessed as the number of *cis* configurations observed across all autosomal protein-coding genes contained in designated autosome, divided by total configuration count per autosome.
